# Supplementary material for: Functional Characterization of Outer Membrane Proteins (OMPs) in Xenorhabdus nematophila and Photorhabdus luminescens through Insect Immune Defense Reactions
Source: MDPI journal article supplement (doi:10.3390/insects10100352), 2019-10-17
Supplement: s1 [file s1]

Article

# Functional Characterization of Outer Membrane Proteins (OMPs) in *Xenorhabdus nematophila* and *Photorhabdus luminescens* through Insect Immune Defense Reactions

Reyhaneh Darsouei <sup>1</sup>, Javad Karimi <sup>1,\*</sup>, and Gary B. Dunphy <sup>2</sup>

<sup>1</sup> Biocontrol and Insect Pathology Lab., Department of Plant Protection, School of Agriculture, Ferdowsi University of Mashhad, Mashhad 9177948974, Iran; rdarsouei@gmail.com

<sup>2</sup> Department of Natural Resource Sciences, Faculty of Agricultural and Environmental Sciences, McGill University, 21 111 Lakeshore Rd, Quebec H9X 3V9, Canada; gary.dunphy@mcgill.ca

\* Correspondence: jkb@um.ac.ir; Tel.: +98-51-3880-5817; Fax: +98-51-37430-878

Received: 10 September 2019; Accepted: 6 October 2019; Published: date

## Supplementary Materials

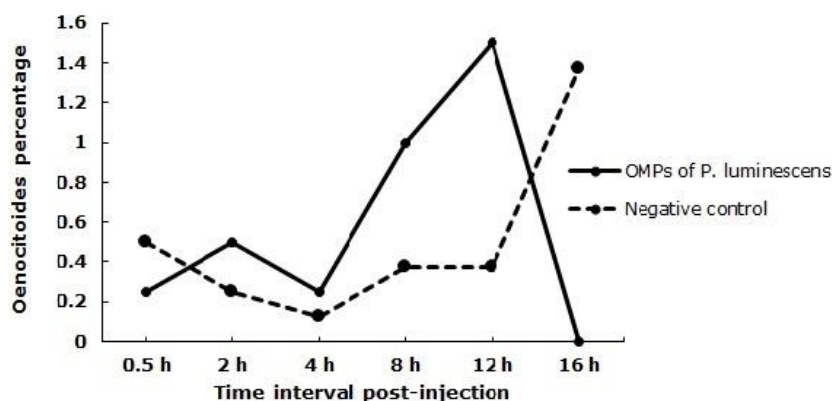

**Figure S1.** Changes of oenocytoids in fifth instar larvae of *Spodoptera exigua* after injection with outer membrane proteins of *Photorhabdus luminescens*.

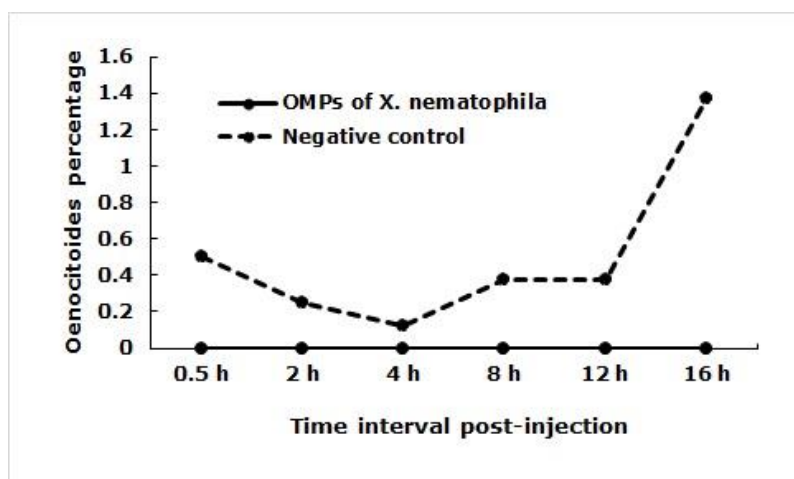

**Figure S2.** Changes of oenocytoids in last instar larvae of *Spodoptera exigua* after injection with outer membrane proteins of *Xenorhabdus nematophil*.

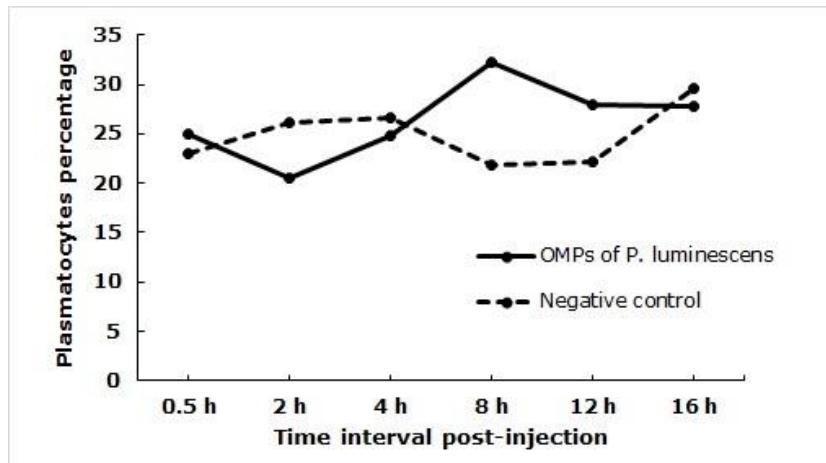

**Figure S3.** Fluctuation pattern of plasmatocytes in fifth instar larvae of *Spodoptera exigua* after injection with outer membrane proteins of *Photorhabdus luminescens*.

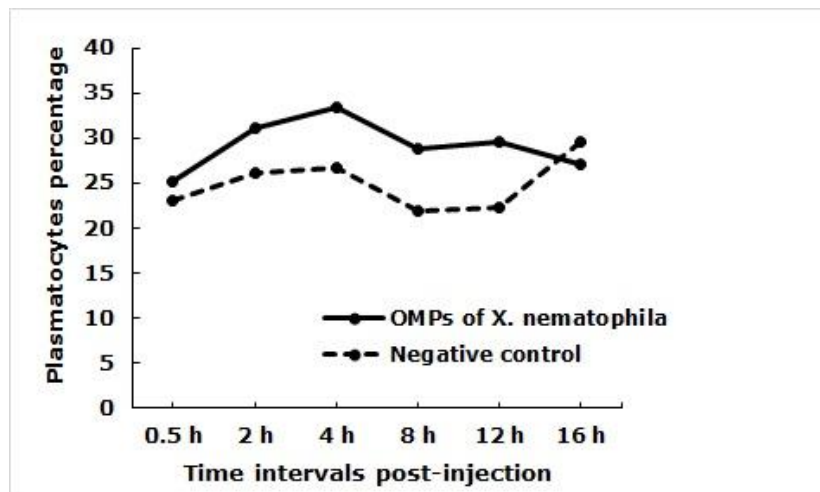

**Figure S4.** Changes of plasmatocytes in the last larvae of *Spodoptera exigua* after injection with outer membrane proteins of *Xenorhabdus nematophil*.

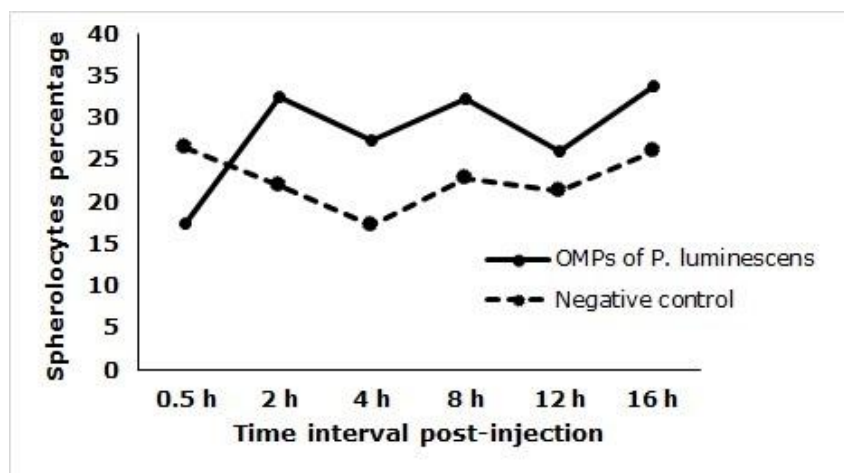

**Figure S5.** Changes of spherulocytes in fifth instar larvae of *Spodoptera exigua* after injection with outer membrane proteins of *Photorhabdus luminescens*.

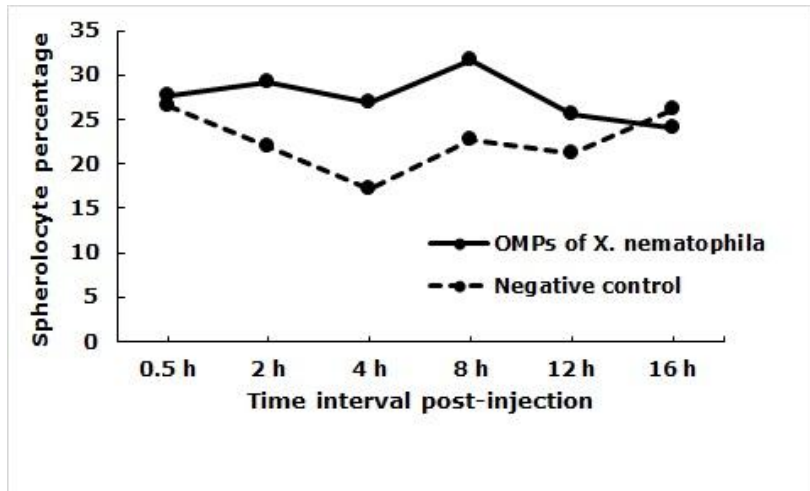

**Figure S6.** Fluctuation pattern of spherulocytes in last instar larvae of *Spodoptera exigua* after injection with outer membrane proteins of *Photobacterium luminescens*.
